# Supplementary material
Source: publisher figshare collection journal article supplement (https://karger.figshare.com/ndownloader/files/28947327)
Supplement: Supplementary file 1 [file 28947327]

**Supplementary Material**

**Zusatztabelle 1:** Auswahl therapeutischer Interventionen, die aus einer Verhaltensanalyse und dem Verstärkermodell der Suizidalität abgeleitet werden können.

Die hier vorgestellten Intervention entstammen oder sind abgeleitet von Interventionen, wie sie in der DBT und ACT für suizidales Verhalten vorgeschlagen werden [Linehan, 1993; Hayes, 1992], zusätzlich auch von der Mitgefühlsorientierten Therapie [Gilbert, 2010]. Das vorgeschlagene Schema (hier am Beispiel von Jessica aus Abb. 1) kann sowohl für Suizidideationen als auch suizidales Verhalten im weiteren Sinne (z.B. Methodenrecherche, Suizidvorbereitung, Chat in sozialen Medien über Suizid, …) verwendet werden. Die Analyse, wie der Patient suizidales Verhalten im engeren Sinne (also den Suizid oder Suizidversuch) hierdurch verhindert, kann es dem Therapeuten ermöglichen, sehr wirksame Verstärker für alternative Problemlösestrategien zu definieren und einzusetzen [Linehan, 1993].

|  | Stimulus (S) | Organism (O) | Response (R), consequence contingency (K/C) |
| --- | --- | --- | --- |
|  | *Auslöser, Schlüsselreize, interne und externe Trigger (problematische Ereignisse)* | *Glaubenssätze, dysfunktionale Grundannahmen, maladaptive kognitiv-emotionale Schemata, biologische Faktoren, die mich in der Situation anfällig machen (Temperament, aktuelle Depression, Schlafmangel, Drogen, Kindheitstraumata...)* | *Dysfunktionales Verhalten/Denken, Verstärkermechanismen* |
| *Validierungs-techniken* | Validierung primärer Emotionen (d.h. Emotionen, die als erstes da waren und zu der Situation/Auslöser passen: “Das hat Sie überrascht/getroffen“) | Validierung der individuellen Vulnerabilität Anleiten zur Selbstvalidierung (z.B. „Das ist wirklich eine schwere Situation für mich“, „Das war ein ganz schöner Schock“) | Validierung der Emotionen, die den Suizidgedanken unmittelbar vorausgegangen sind (z.B. unerträglicher Schmerz, Leiden, Hilflosigkeit)  Validierung der Verstärkung (“Ich verstehen, dass es Ihnen an dieser Stelle erstmal Erleichterung verschafft hat, an Suizid zu denken, weil sie dadurch einen Ausweg gesehen haben”) |
| *Psychoedukation* | Primäre Emotionen identifizieren und benennen (sie sind dem Pat. oft nicht bewusst, bzw. werden nicht wahrgenommen, da die sekundären Emotionen so schnell da sind) | Psychoedukation von Anfälligkeitsfaktoren in der konkreten Situation (situativ, kognitiv-emotional, biologisch) | Funktionalität von Suizidalität im Hinblick auf Erleichterung und Regulation aversiver Emotionen erklären („Belohnung“, Verstärkung)  Teufelskreis und Effekt erklären, dass Suizidgedanken und suizidales Verhalten zentrale maladaptive Schemata bestätigt und bestärkt. |
| *Kognitive Techniken* | Diskriminationslernen  (z.B. “Was ist heute anders als in der schwierigen Situation, die ich damals in der Kindheit erlebt hatte, wo ich mich auch so hilflos gefühlt habe”) | Achtsamkeits-basierte Techniken (Gewahrwerden automatischer Gedanken, sekundärer Emotionen, körperlicher Reaktionen wie Herzrasen, Schwäche, Taubheit, etc.)  Kognitive Neubewertung dysfunktionaler Grundannahmen (“Obwohl mich meine intensiven Gefühle glauben lassen, dass ich den Zustand keine Sekunde länger aushalten kann, weiß ich, dass ich ähnliche Situationen in der Vergangenheit schon durchgestanden bin”, “Ich bin ok”)  Defusionstechniken (d.h. Techniken zum Distanzieren und Trennen von Gedanken und/oder Gefühlen) | Pro-/Kontralisten für die individuellen Suizidgedanken und suizidales Verhalten sowie für alternatives Denken/Handeln  Gedanken/Images einer positiven Zukunft aufbauen (z.B. „Der Neue Weg“ in der DBT, der eine Orientierung an Werten, Bedürfnissen und Wünschen beinhaltet)  Commitment-Strategien wie sie in der ACT und DBT vorgeschlagen werden (z.B. dem Leben eine Chance geben (zumindest für eine gewisse Zeit); das Commitment geben, für eine – wenn auch nur kurze - Zeit am Leben zu bleiben (z.B. bis zur nächsten Therapiesitzung in der nächsten Woche) |
| *Emotions-regulation* | Emotionale Exposition primärer Emotionen/Schlüssel-situationen (d.h. eine nicht-verstärkte emotionale Konfrontation herstellen, wodurch eine Reattribuierung der S-R-Kontingenz möglich wird) | Emotionsregulation sekundärer Emotionen (Emotionen, die durch interne Bewertungen/Interpretationen hervorgerufen wurden; z.B. Hilflosigkeit oder Scham nach einem unerwarteten Ereignis, das zunächst Angst auslöst)  Expositions-basierte Traumatherapie wie z.B. DBT-PTBS [Bohus et al., 2019; Bohus et al., 2013] | Unterbinden von Vermeidungsverhalten (Blockieren der Verstärker-Kontingenz) |
| *Alternatives Verhalten, Fertigkeiten (Skills)* | Vermeidungsverhalten blockieren (in der Situation bleiben)  Angemessener Ausdruck von Gefühlen und Bedürfnissen („Das macht mich sehr traurig“, „Ich möchte Dich nicht verlieren“, „Kannst Du mir helfen, Deine Entscheidung zu verstehen?“) | Alternative Techniken zur Selbstbestätigung, Selbstvalidierung und Selbstberuhigung | Therapeut verstärkt alternatives Problemlöse-Verhalten und nicht-suizidale Reaktionen; bleibt dabei, dass Suizid keine gute Lösung ist; vermittelt Hoffnung.  Mit der Zeit sollte das aktive Eingreifen durch den Therapeuten schrittweise zurückgefahren werden, um sicher zu stellen, dass das Widerstehen von suizidalem Denken/Verhalten mehr und mehr unter die Kontrolle natürlicher Verstärker kommen kann [Linehan, 1993]:  Ein alternatives, funktionales Verhalten aufbauen, das durch attraktive Belohnungen natürlich verstärkt wird: Einen Freundeskreis aufbauen und pflegen, Gefühl der Verbundenheit und Teilnahme herstellen durch Verantwortungsübernahme und soziale Integration (z.B. Ehrenamtliche Arbeit, ein Haustier halten, sich um Pflanzen kümmern), … |

**Literatur**

Bohus M, Dyer AS, Priebe K, Krüger A, Kleindienst N, Schmahl C, et al.: Dialectical behaviour therapy for post-traumatic stress disorder after childhood sexual abuse in patients with and without borderline personality disorder: a randomised controlled trial. Psychother Psychosom 2013;82:221–233.

Bohus M, Schmahl C, Fydrich T, Steil R, Müller-Engelmann M, Herzog J, et al.: A research programme to evaluate DBT-PTSD, a modular treatment approach for Complex PTSD after childhood abuse. Borderline Personal Disord Emot Dysregulation 2019;6:7.

Gilbert P: Compassion focused therapy: Distinctive features, Routledge, 2010.

Hayes SC: Verbal relations, time, and suicide [Internet]; in Hayes SC, Hayes LJ (eds): Understanding verbal relations. Reno, NV, Context Press, 1992, [cited 2019 Dec 1], pp 109–118.

Linehan MM: Cognitive-Behavioral Treatment of Borderline Personality Disorder, Guilford Publications, 1993.
